# Supplementary material for: Catalytic dehydration of fructose to 5-hydroxymethylfurfural over a mesoscopically assembled sulfated zirconia nanoparticle catalyst in organic solvent
Source: Royal Society of Chemistry journal article supplement (doi:10.1039/c4ra09585e), 2014-01-01
Supplement: c4ra09585e1.pdf [file c4ra09585e1.pdf]

**Catalytic dehydration of fructose to 5-hydroxymethylfurfural over  
mesoscopically assembled sulfated zirconia nanoparticles catalyst in  
organic solvent**

**Supplementary data**

**Contents**

1. Particles Size Calculation
2. Reactor Studies
3. Supporting figures

## 1. Particles Size Calculation:

Here, we calculated the particle size by using Scherrer equation based on PXRD result.

According to the Scherrer equation size of the crystallite  $D = K\lambda / (\beta \cos \theta)$  Where;

$\beta$  is the full width of the peak at half maximum intensity of a specific phase in radian.

K is a constant that varies with the method of taking the breadth ( $0.89 < K < 1$ ).

$\lambda$  is the wavelength of incident X-rays.

$\theta$  is the centre angle of the peak.

D is the crystallite length.

From Fig. 2, for the MAZN-1;

$2\theta = 30.46^\circ$ ;  $\theta = 15.23^\circ$ ;  $\cos \theta = \cos (15.23^\circ) = 0.965$ ;  $\beta = 0.0184$ ;  $\lambda = 0.154$  nm and

$K = 0.9$

Therefore, estimated D for MAZN-1 will be 7.80 nm.

Particles size for the MAZN-2 will be calculated as follows.

$2\theta = 30.34^\circ$ ;  $\theta = 15.17^\circ$ ;  $\cos \theta = 0.9652$ ;  $\beta = 0.0186$ ;  $\lambda = 0.154$  nm and  $K = 0.9$

D for MAZN-2 will be 7.72 nm.

Particles size calculation will be for MAZN-3

$2\theta = 30.17^\circ$ ;  $\theta = 15.085^\circ$ ;  $\cos \theta = 0.966$ ;  $\beta = 0.0194$ ;  $\lambda = 0.154$  nm and  $K = 0.9$

D for MAZN-3 will be 7.39 nm.

Particles size calculation will be for MAZN-4

$2\theta = 30.17^\circ$ ;  $\theta = 15.085^\circ$ ;  $\cos \theta = 0.966$ ;  $\beta = 0.0198$ ;  $\lambda = 0.154$  nm and  $K = 0.9$

D for MAZN-4 will be 7.24 nm.

**Particle Size Calculation after Sulfonation:**

From Fig. 3(a), for the MASZN-1;

$$2\theta = 28.16^\circ; \theta = 14.08; \text{Cos}\theta = 0.97; \beta = 0.0196; \lambda = 0.154; K = 0.9$$

Therefore, estimated D for MASZN-1 will be 7.29 nm.

From Fig. 3(b), for the MASZN-2;

$$2\theta = 28.15^\circ; \theta = 14.075; \text{Cos}\theta = 0.97; \beta = 0.0179; \lambda = 0.154; K = 0.9$$

Therefore, estimated D for MASZN-2 will be 7.98 nm.

From Fig. 3(c), for the MASZN-3;

$$2\theta = 28.15^\circ; \theta = 14.075; \text{Cos}\theta = 0.97; \beta = 0.0182; \lambda = 0.154; K = 0.9$$

Therefore, estimated D for MASZN-3 will be 7.85 nm.

From Fig. 3(d), for the MASZN-4;

$$2\theta = 28.15^\circ; \theta = 14.075; \text{Cos}\theta = 0.97; \beta = 0.0196; \lambda = 0.154; K = 0.9$$

Therefore, estimated D for MASZN-4 will be 7.29 nm.

## 2. Reactor Studies

**Table S1.** Conversion and yield following glucose dehydration over mesoscopic assembly sulfated zirconia nanoparticles.<sup>[a]</sup>

| Entry | Substrate | Catalysis | <i>t</i> (min) | <i>T</i> (°C) | Conversion/% | HMF yield/% |
|-------|-----------|-----------|----------------|---------------|--------------|-------------|
| 1     | Glucose   | MASZN-1   | 300            | 120           | 81.2         | 12.8        |
| 2     | Glucose   | MASZN-2   | 300            | 120           | 84.3         | 21.5        |
| 3     | Glucose   | MASZN-3   | 300            | 120           | 83.6         | 12.8        |
| 4     | Glucose   | MASZN-4   | 300            | 120           | 80.4         | 20.3        |

[a] Conditions: glucose (1 mmol), each catalyst is 10mg; solvent [AMIM]Cl (3 mL).

**Table S2.** The effect of solvent.<sup>[a]</sup>

| Entry | Solvent          | Conversion(%) | HMF Yield(%) |
|-------|------------------|---------------|--------------|
| 1     | DMF              | 73.9          | 35.4         |
| 2     | NMP              | 78.5          | 43.6         |
| 3     | DMA              | 64.8          | 22.8         |
| 4     | H <sub>2</sub> O | 43.7          | 8.5          |

[a] Reaction conditions: fructose (1 mmol), Catalyst MASZN-3 (10 mg), solvent (3mL), T=110 °C, t=120 min.

**Table S3.** Fructose dehydration in various catalytic systems.

| Entry | Catalysis                                      | Solvent        | <i>t</i><br>(min) | <i>T</i><br>(°C) | Conversion<br>(%) | HMF<br>Yield(%)<br>) | Ref. |
|-------|------------------------------------------------|----------------|-------------------|------------------|-------------------|----------------------|------|
| 1     | Bifunctional SO <sub>4</sub> /ZrO <sub>2</sub> | water          | 360               | 100              | 25.4              | 8.28                 | 32   |
| 2     | TESAS-SBA-15                                   | MIBK-2-butanol | 141               | 130              | 84                | 71                   | 27   |
| 3     | MIL-101(Cr)-SO <sub>3</sub> H                  | DMSO           | 60                | 120              | 99                | 90                   | 28   |
| 4     | a-CSS                                          | [BMIM][Cl]     | 10                | 80               | —                 | 83                   | 31   |
| 5     | MASZN-3                                        | DMSO           | 120               | 110              | 98.5              | 91.9                 | [a]  |

[a]:In our reasearch.

### 3. Supporting figures

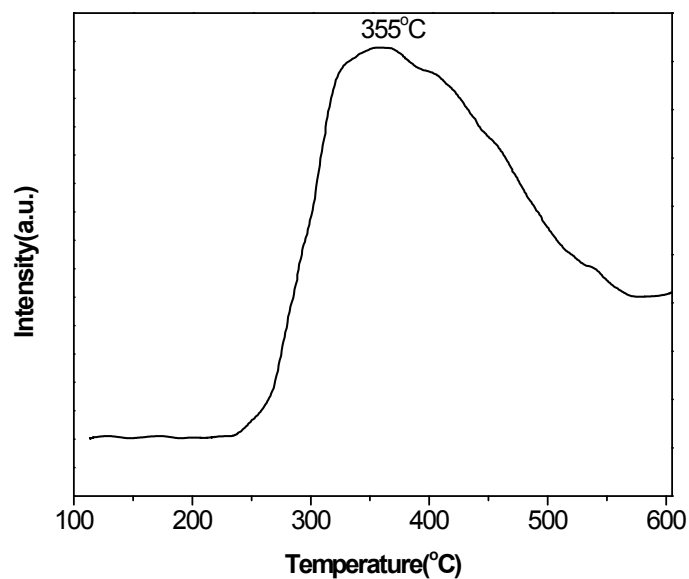

**Figure S1.** TPD-NH<sub>3</sub> profile over self-assembled mesoporous sulfated zirconia material

(MASZN-3).

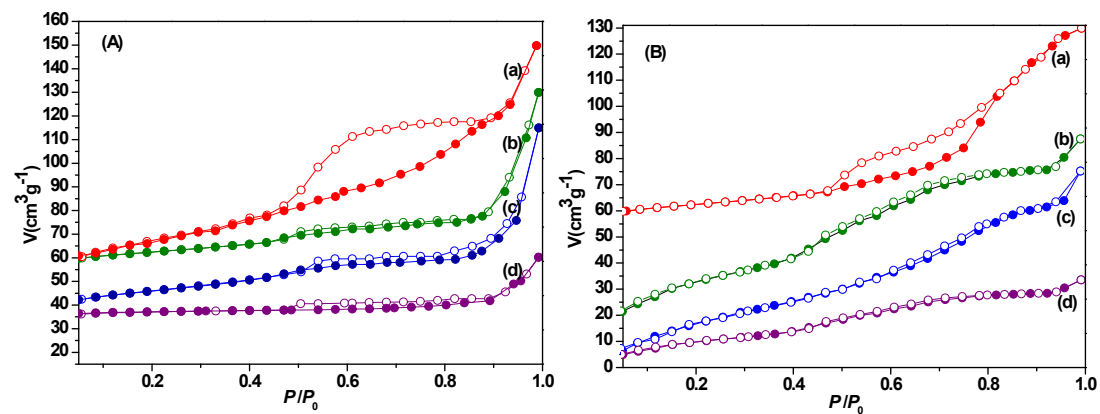

**Figure S2.** N<sub>2</sub> adsorption/desorption isotherms of A) calcined samples a) MAZN-1, b) MAZN-2, c) MAZN-3, and d) MAZN-4 ; B) calcined mesoporous sulfated samples a) MASZN-1, b) MASZN-2, c) MASZN-3, and d) MASZN-4 measured at 77 K. Adsorption points are marked by filled circles and desorption points by empty circles.

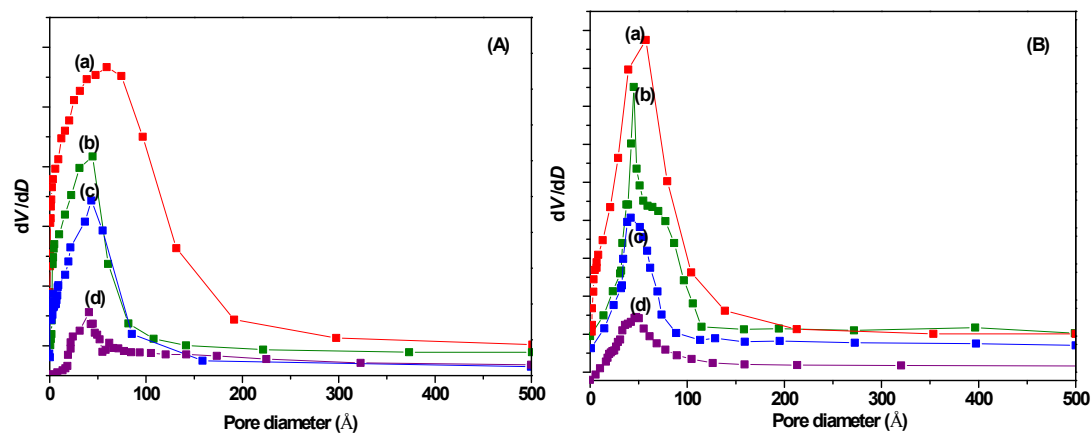

**Figure S3.** BJH pore size distribution curves of A) calcined samples a) MAZN-1, b) MAZN-2, c) MAZN-3, and d) MAZN-4; B) calcined mesoporous sulfated samples a) MASZN-1, b) MASZN-2, c) MASZN-3, and d) MASZN-4.

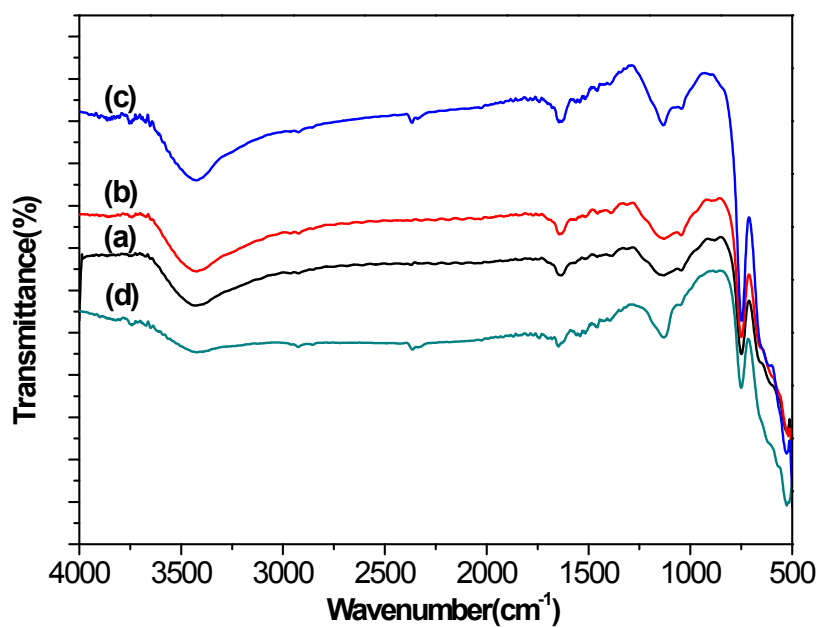

**Figure S4.** FTIR spectra of the mesoporous  $ZrO_2$  samples: (a) MAZN-1, (b) MAZN-2, (c) MAZN-3 and (d) MAZN-4.

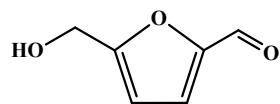

HMF

Chemical Formula: C<sub>6</sub>H<sub>6</sub>O<sub>3</sub> Molecular Weight: 126.11

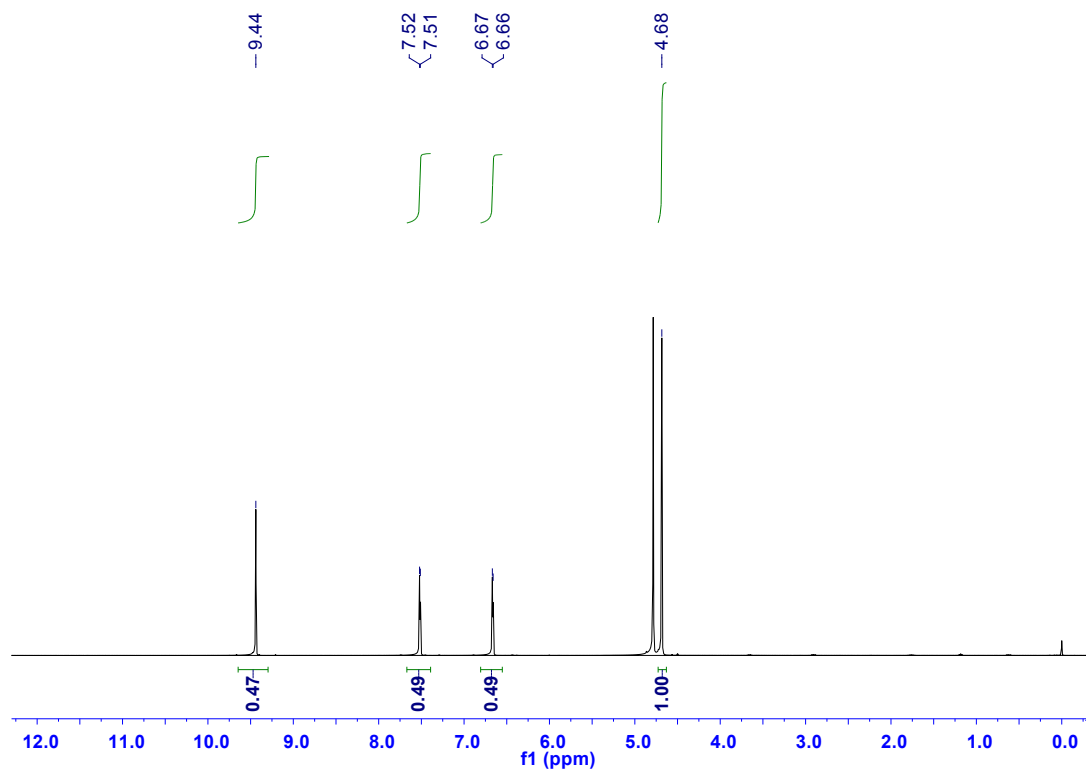

Figure S5. <sup>1</sup>H NMR spectra of synthetic HMF.

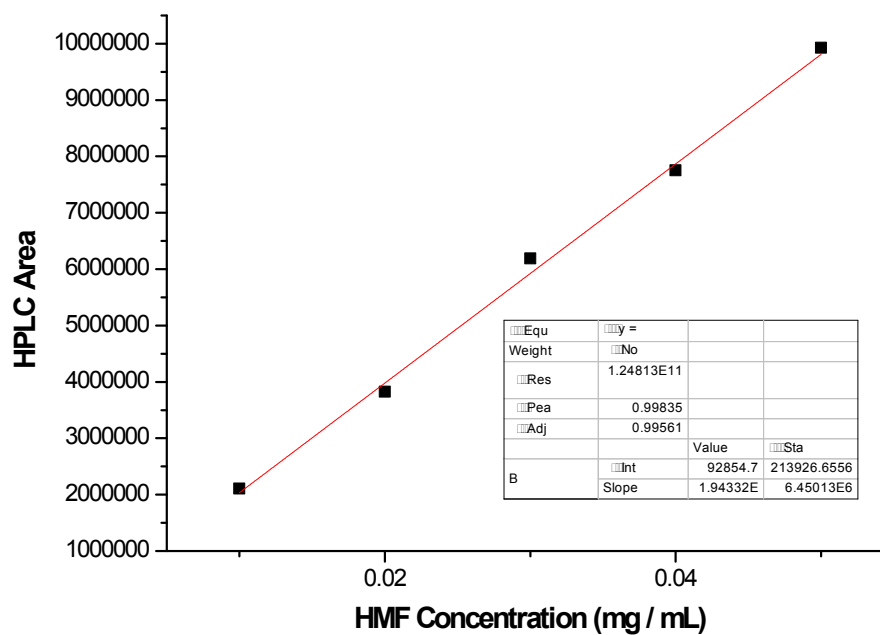

Figure S6. Standard curve of authentic HMF in H<sub>2</sub>O.
